# Supplementary material for: Role of the Mycobacterium marinum ESX-1 Secretion System in Sliding Motility and Biofilm Formation
Source: PubMed Central journal article supplement (PMC5988883; doi:10.3389/fmicb.2018.01160), 2018-05-30
Supplement: Data_Sheet_1.pdf [file Data_Sheet_1.pdf]

# **Role of the *Mycobacterium marinum* ESX-1 Secretion System in Sliding Motility and Biofilm Formation**

**Li-Yin Lai<sup>1</sup>, Tzu-Lung Lin<sup>1</sup>, Yi-Yin Chen<sup>3</sup>, Pei-Fang Hsieh<sup>1</sup>, Jin-Town Wang<sup>\*1,2</sup>**

<sup>1</sup>Department of Microbiology, National Taiwan University College of Medicine,  
Taipei, Taiwan.

<sup>2</sup>Department of Internal Medicine, National Taiwan University Hospital, Taipei,  
Taiwan.

<sup>3</sup>Department of Pediatrics, Chang Gung Children's Hospital, Chang Gung Memorial  
Hospital, Chang Gung University, College of Medicine, Taoyuan, Taiwan.

**\* Correspondence:**

Jin-Town Wang, M.D., Ph.D.

Dept. of Microbiology

National Taiwan University College of Medicine

1, Sec 1, Jen-Ai Rd.

Taipei, Taiwan

wangjt@ntu.edu.tw

**Supplementary Table 1. Primers and plasmids used in this work**

| Name of primer  | Sequence                                | Purpose                                                            | Reference                |
|-----------------|-----------------------------------------|--------------------------------------------------------------------|--------------------------|
| TnF             | TGCAGCAACGCCAGGTCCAC<br>ACT             | Semi-random PCR                                                    | Chen et al.,<br>2015     |
| TnR             | CAGAAAGTCGTCAGGTCAG<br>C                | Semi-random PCR                                                    | Chen et al.,<br>2015     |
| HOPS1           | GGCGTAGGAACCTCCATCAT<br>C               | Semi-random PCR                                                    | Bardarov et<br>al., 1997 |
| HOPS2           | CTTGCTCTTCCGCTTCTTCTC<br>C              | Semi-random PCR                                                    | Bardarov et<br>al., 1997 |
| semi-rand_2-1   | GGCCACGCGTCGACTAGTAC<br>NNNNNNNNNNGCAGC | Semi-random PCR                                                    | Choi et al.,<br>2001     |
| semi-rand_4     | GGCCACGCGTCGACTAGTAC                    | Semi-random PCR                                                    | Choi et al.,<br>2001     |
| MMAR_RS27300-qF | GGG AAC GCG GCT GAA GT                  | mmar_5436 mRNA level                                               |                          |
| MMAR_RS27300-qR | GCG AAG TGT CCG GTA ATC<br>GT           | mmar_5436 mRNA level                                               |                          |
| MMAR_5437-qF    | GGA AAC CGT TGC GCT CTG                 | mmar_5437 mRNA level                                               |                          |
| MMAR_5437-qR    | GGG TGT TGT GAT TCC GGA<br>AG           | mmar_5437 mRNA level                                               |                          |
| MMAR_5438-qF    | GAG GCA AGG CGT TGA CGT<br>T            | mmar_5438 mRNA level<br><i>espE</i> deletion<br>Operon analysis    |                          |
| MMAR_5438-qR    | TGT CTT CTT CAG GCG AAT<br>TCG          | mmar_5438 mRNA level                                               |                          |
| MMAR_5439-qF    | TCC CAA GGC GGT CAA CAG                 | <i>espE</i> mRNA level<br>PCR check <i>espF</i><br>Operon analysis |                          |
| MMAR_5439-qR    | GCA CCG TCT TCG TCG TCT<br>TC           | <i>espE</i> mRNA level<br>PCR check <i>espE</i><br>Operon analysis |                          |
| MMAR_5440-qF    | TGA ACG TCG TGC CTT CAT<br>TC           | <i>espF</i> mRNA level<br>PCR check <i>espF</i>                    |                          |
| MMAR_5440-qR    | GTT GGT CGC CGA TTT GAG<br>TT           | <i>espF</i> mRNA level<br>PCR check <i>espE</i><br>Operon analysis |                          |

|               |                                  |                                                                                             |
|---------------|----------------------------------|---------------------------------------------------------------------------------------------|
| MMAR_5441-qF  | ATG TCG TCG GAG TCG AGG<br>TAA   | <i>espG</i> mRNA level<br>PCR check <i>espG</i>                                             |
| MMAR_5441-qR  | CAG GGA AAT CGA CCA GGT<br>GTA A | <i>espG</i> mRNA level<br>PCR check <i>espF</i><br>PCR check <i>espG</i><br>Operon analysis |
| MMAR_5442-qF  | CAC GGG CTG ACC GAG AAG          | <i>espH</i> mRNA level<br>PCR check <i>espH</i><br>PCR check <i>eccA1</i>                   |
| MMAR_5442-qR  | GGG TTG GTC ACG GTG AAC<br>AT    | <i>espH</i> mRNA level<br>PCR check <i>espH</i>                                             |
| MMAR_5443-qF  | GAC ACC TAC AGC CCG GAA<br>GA    | <i>eccA1</i> mRNA level<br>PCR check <i>eccA1</i><br>Operon analysis                        |
| MMAR_5443-qR  | GTC ATT CCC AGC CGC AAT          | <i>eccA1</i> mRNA level                                                                     |
| MMAR_5443-qR2 | CTT GCA GTC TGT CCA CAT<br>CG    | PCR check <i>eccA1</i>                                                                      |
| MMAR_5444-qF  | GCG ATG CTG GCG GAC TAT          | <i>mmar_5444</i> mRNA level                                                                 |
| MMAR_5444-qR  | GAT CGA GTG GCG TCC CTT<br>T     | <i>mmar_5444</i> mRNA level<br>PCR check <i>eccA1</i><br>Operon analysis                    |
| MMAR_5445-qF  | CGT TGT GGT GGA CGA GTT<br>TG    | <i>mmar_5445</i> mRNA level                                                                 |
| MMAR_5445-qR  | GGT CGA ACA GGC CGA TGA          | <i>mmar_5445</i> mRNA level                                                                 |
| 5437-38 gap F | CGT ACA GAG CAG TTG CAG<br>TC    | Operon analysis                                                                             |
| 5437-38 gap R | GCC GAG CAG TCG ATT CGG          | Operon analysis                                                                             |
| 5438-39 gap F | TCG GAA ACC GCG CAA GCC          | Operon analysis<br>PCR check <i>espE</i>                                                    |
| 5438-39 gap R | TTG AAG ATA TCG CCC GGG<br>TC    | Operon analysis                                                                             |
| 5439-40 gap F | AGG GCA AGG CAA CGA<br>GGG       | Operon analysis                                                                             |
| 5439-40 gap R | GTC GCC GAT TTG AGT TCG<br>C     | Operon analysis                                                                             |
| 5440-41 gap F | GCG AAC TCA AAT CGG CGA<br>C     | PCR check <i>espH</i>                                                                       |
| 5440-41 gap R | ACA TCG TCA CCG GTG CCC          | Operon analysis                                                                             |

|                   |                         |                       |
|-------------------|-------------------------|-----------------------|
|                   |                         | <i>espE</i> deletion  |
| 5441-42 gap F     | AGC TTC CTC CCC GGT ACC | Operon analysis       |
| 5441-42 gap R     | AGT CCA GAG TCC TCA GAC | Operon analysis       |
|                   | G                       | PCR check <i>espF</i> |
| 5442-43 gap F     | TTC GCC ACC CGC TAC GAG | Operon analysis       |
| 5442-43 gap R     | TCG AGA TCT GCG CCG TGC | Operon analysis       |
| 5443-44 gap F     | AGG CAA TCG CCA CGG TGC | Operon analysis       |
| 5443-44 gap R     | CGA CAA CGA TGC CCA GCG | Operon analysis       |
|                   |                         | PCR check <i>espH</i> |
| 5444-45 gap F     | GTA CTA CAT CGA CCC GGA | Operon analysis       |
|                   | AG                      |                       |
| 5444-45 gap R     | TGA TCA CGA TCA TGC CCA | Operon analysis       |
|                   | GC                      |                       |
| 5445-46 gap F     | GCA CGC TCT ATA TCA GTG | Operon analysis       |
|                   | GG                      |                       |
| 5445-46 gap R     | TCG TCC ATG ATT CCC AGC | Operon analysis       |
|                   | G                       |                       |
| 5446-47 gap F     | CCC TTA CAT CGA GCC GCC | Operon analysis       |
| 5447-48 gap R     | CGG TAT TCA GCT CCG GTG | Operon analysis       |
|                   | G                       |                       |
| 5448-49 gap F     | GAC GAG GCC GAC GAA     | Operon analysis       |
|                   | GAC                     |                       |
| 5449-50 gap R     | TGC GCT GGA TGC TGC CTC | Operon analysis       |
| 5450-51 gap F     | CGG AGG CTG CTG CAC AAC | Operon analysis       |
| 5450-51 gap-R2    | TGC AGC CAC GCG AAG GAC | Operon analysis       |
| 5439-inverse-F-in | TCC GGG CAA CCG GCG G   | <i>espE</i> deletion  |
| 5439-inverse-R-in | TCG CGG AAT TCC TTA CAC | <i>espE</i> deletion  |
|                   | TCG                     |                       |
| MMAR5440-Ff-F     | AAAGGCCTCGAAAAGGTGC     | <i>espF</i> deletion  |
|                   | C                       | Operon analysis       |
| MMAR5440-Ff-R     | AGCGGACCGGTCATAGGGG     | <i>espF</i> deletion  |
|                   | GTAGACCTTTC             |                       |
| MMAR5440-Rf-F     | GAAAGGTCTACCCCCTATGA    | <i>espF</i> deletion  |
|                   | CCGGTCCGCT              |                       |
| MMAR5440-Rf-R     | GCGTACTCGTCGAGTGCACC    | <i>espF</i> deletion  |
| MMAR5441-Ff-F     | CACCCAAGATCGACATTCCG    | <i>espG</i> deletion  |
| MMAR5441-Ff-R     | ACGGAGAGGATTAAGATCAG    | <i>espG</i> deletion  |
|                   | CCAAAAATCT              |                       |

|                                              |                                            |                                                      |
|----------------------------------------------|--------------------------------------------|------------------------------------------------------|
| MMAR5441-Rf-F                                | AGATTTTTGGCTGATCTTAAT<br>CCTCTCCGT         | <i>espG</i> deletion                                 |
| MMAR5441-Rf-F                                | ACACCAGATGCTCCGAACCG                       | <i>espG</i> deletion                                 |
| MMAR5442-Ff-F                                | AGGCCTGCAGGGCGTCACG<br>G                   | <i>espH</i> deletion                                 |
| MMAR5442-Ff-R                                | GCGATCAGTCATGTATGTGG<br>CGTCCCTTTC         | <i>espH</i> deletion                                 |
| MMAR5442-Rf-F                                | GAAAGGGACGCCACATACAT<br>GACTGATCGC         | <i>espH</i> deletion                                 |
| MMAR5442-Rf-R                                | TGCTTGCTGGGCTGTGCGAC                       | <i>espH</i> deletion                                 |
| MMAR5443-Ff-F                                | AACCCGCCAATGTCGAACCG                       | <i>eccA1</i> deletion                                |
|                                              |                                            | Operon analysis                                      |
| MMAR5443-Ff-R                                | GCGAAGCCCCATGTTGTATC<br>ACCGTTCGTT         | <i>eccA1</i> deletion                                |
| MMAR5443-Rf-F                                | AACGAACGGTGATACAACAT<br>GGGGCTTCGC         | <i>eccA1</i> deletion                                |
| MMAR5443-Rf-R                                | TTGAGGGTCTCGTCGGGCAG                       | <i>eccA1</i> deletion                                |
| 5439-complement-R                            | CTA GAG GAG GGT CCC CTC                    | <i>espE</i> complementation                          |
| Inverse 39 F                                 | ATG GTG CCA AAG GGA AGC<br>GG              | <i>espE</i> complementation<br>PCR check <i>espE</i> |
| Inverse 39 R                                 | GTA CGT CGA TTC CTC GCT<br>CG              | <i>espE</i> complementation                          |
| 5` start site<br>(complementation) F         | GTT CCA CTG CGC AAT GCT<br>TC              | <i>espE, F, G and H</i><br>complementation           |
| 5`start-R2-5440                              | GTC CTG TCA TGT ACG TCG<br>ATT CCT CGC TCG | <i>espF</i> complementation                          |
| 5` start site<br>(complementation)<br>R-5441 | GAG CGG ACC GGT CAT GTA<br>CGT CGA TTC CTC | <i>espG</i> complementation                          |
| 5` start site<br>(complementation)<br>R-5442 | CCC GGG CAG GTC CAC GTA<br>CGT CGA TTC CTC | <i>espH</i> complementation                          |
| mmar_5440 F<br>(complementation)             | GAG GAA TCG ACG TAC ATG<br>ACA GGA CTA CTG | <i>espF</i> complementation                          |
| mmar_5440 R<br>(complementation)             | TCA GCC AAA AAT CTT GTC<br>GA              | <i>espF</i> complementation<br>PCR check <i>espF</i> |
| mmar_5441 F<br>(complementation)             | GAG GAA TCG ACG TAC ATG<br>ACC GGT CCG CTC | <i>espG</i> complementation                          |

|                                  |                                            |                             |
|----------------------------------|--------------------------------------------|-----------------------------|
| mmar_5441 R<br>(complementation) | TCA ACC TCG GGC GGT GG                     | <i>espG</i> complementation |
| mmar_5442 F<br>(complementation) | GAG GAA TCG ACG TAC GTG<br>GAC CTG CCC GGG | <i>espH</i> complementation |
| mmar_5442 R<br>(complementation) | TCA CCG TTC GTT GTA ACG<br>AG              | <i>espH</i> complementation |
| inverse 39 F                     | ATGGTGCCAAAGGGAAGCG<br>G                   | Operon analysis             |
| 5444 F                           | CTGGCAATTGCCACCCATC                        | Operon analysis             |
| 5445 F                           | TCACGAACTCAAGACCGGC                        | Operon analysis             |
| 5446 F                           | CCGACATGGAAGTGGCTTAC                       | Operon analysis             |
| 5448 F                           | ATGACGTCGATCCTCGATCC                       | Operon analysis             |

---

**Supplementary Table 2. Diversity of transposon mutants**

| <b>Library no.</b> | <b>Genes disrupted by transposon</b>              | <b>Insertion sequence</b> |
|--------------------|---------------------------------------------------|---------------------------|
| 6-A5               | Between <i>mmar_5417</i> and <i>mmar_5418</i>     | tgaaactt                  |
| 6-A8               | Between <i>mmar_3099</i> and <i>mmar_3100</i>     | cctttagc                  |
| 6-A9               | <i>mmar_3070</i>                                  | acaaatgg                  |
| 6-A10              | <i>mmar_1029</i>                                  | tctaagt                   |
| 6-A11              | Between <i>mmar_3415</i> and <i>mmar_3416</i>     | caaatta                   |
| 6-A12              | Between <i>mmar_2822</i> and <i>mmar_2823</i>     | gcaatagc                  |
| 6-B5               | <i>mmar_5392</i>                                  | cctaactc                  |
| 6-B9               | <i>mmar_3548</i>                                  | acatttcc                  |
| 6-B12              | <i>mmar_1361</i>                                  | ccatttgg                  |
| 6-C5               | No similarity with sequences of <i>M. marinum</i> | tctttagg                  |
| 6-C7               | <i>mmar_2318</i>                                  | gtaaaggg                  |
| 6-C12              | <i>mmar_3182</i>                                  | gaatttgg                  |
| 6-D2               | <i>mmar_0932</i>                                  | tagtttgg                  |
| 6-D4               | <i>mmar_2766</i>                                  | acatttga                  |
| 6-D6               | No similarity with sequences of <i>M. marinum</i> | tcaattgc                  |
| 6-D7               | No similarity with sequences of <i>M. marinum</i> | gctataca                  |

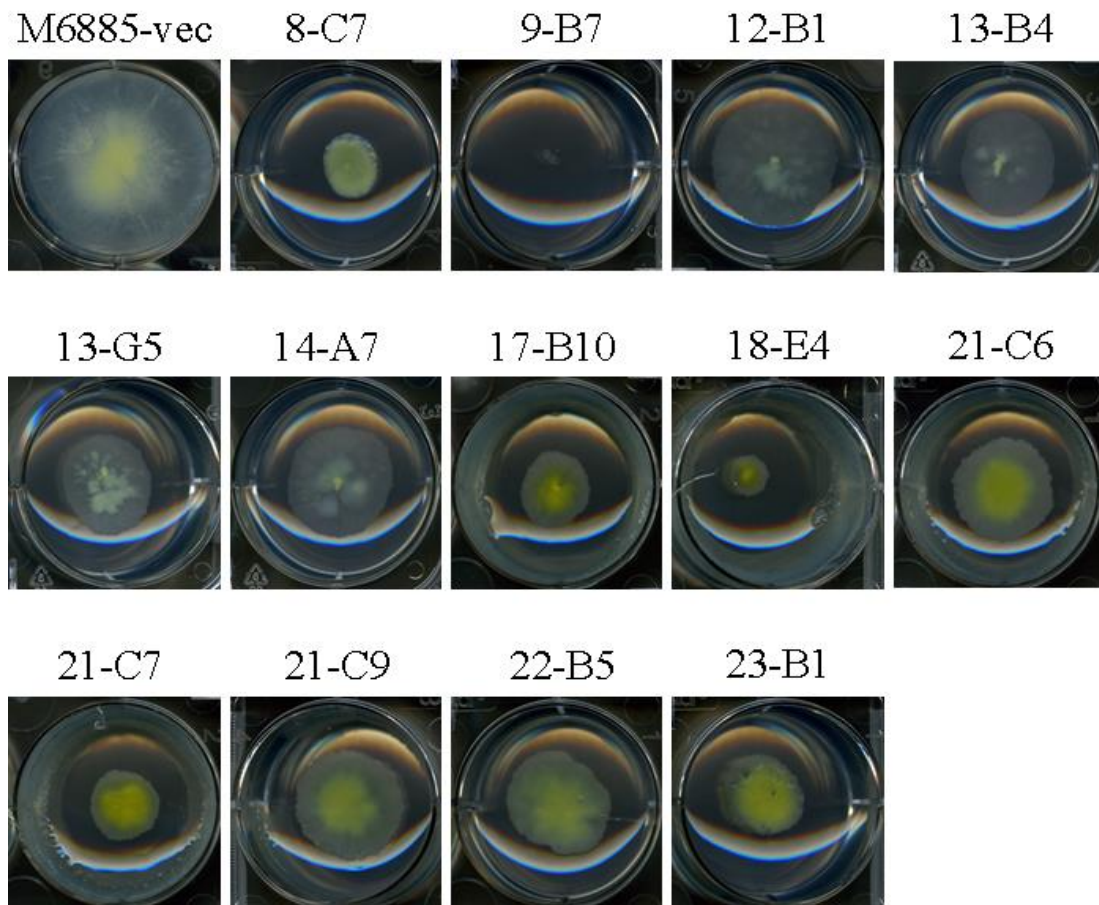

**Supplementary Figure 1. Sliding motility in transposon mutants during stationary phase culture.**

Sliding motility of transposon mutants was determined by adding a 1  $\mu$ L drop from a stationary phase culture onto 6-well sliding plates.



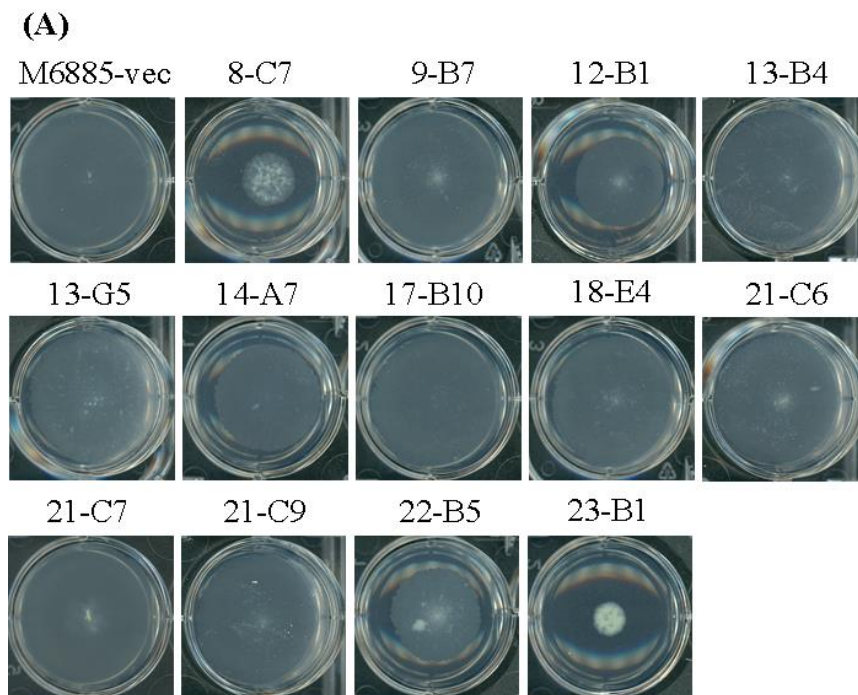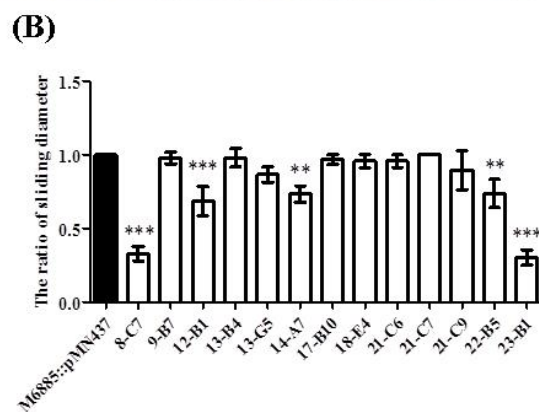

**Supplementary Figure 2. Sliding motility in transposon mutants when the cultures had an  $OD_{600nm}$  of 1.**

**(A)** A 1  $\mu$ L drop from a bacterial culture ( $OD_{600} = 1$ ) was placed onto 6-well sliding plates. **(B)** Quantification of the results in (A). All data were from three independent experiments and presented as means  $\pm$  SDs with one-way ANOVA (\*\* $p < 0.01$ , \*\*\* $p < 0.001$ ). The quantification of sliding diameters was used for normalization, with the wild-type diameter being assigned a value of 1.

(A)

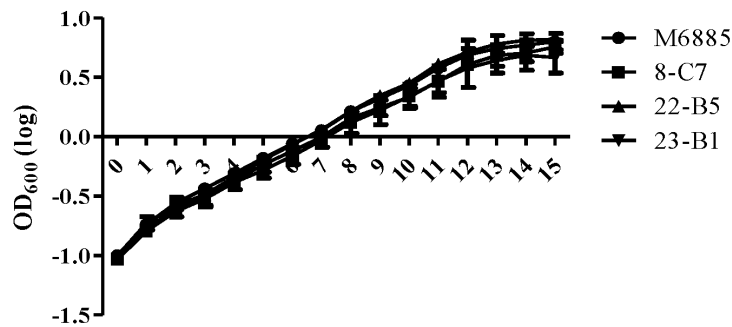

(B)

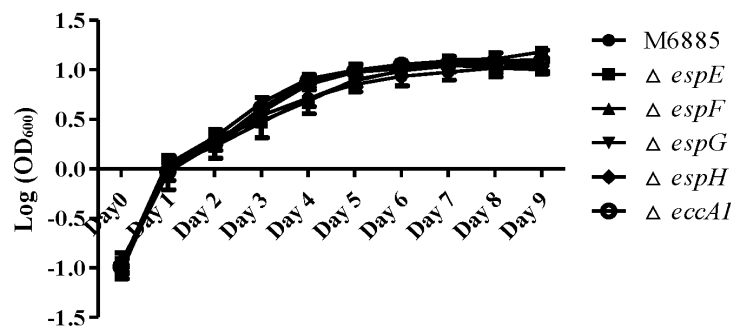

**Supplementary Figure 3. Growth curves of transposon mutants, deletion mutants ( $\Delta espE$ ,  $\Delta espF$ ,  $\Delta espG$ ,  $\Delta espH$  and  $\Delta eccA1$ ), and the wild-type strain.**

(A) Growth curves of transposon mutants and the wild-type strain.  $OD_{600nm}$  was measured for 15 days for cultures in sliding broth. (B) Growth curves of deletion mutants and the wild-type strain.  $OD_{600nm}$  was measured for 9 days in 7H9 medium with OADC and Tween-80. All data were from three independent experiments and presented as means  $\pm$  SDs with one-way ANOVA.

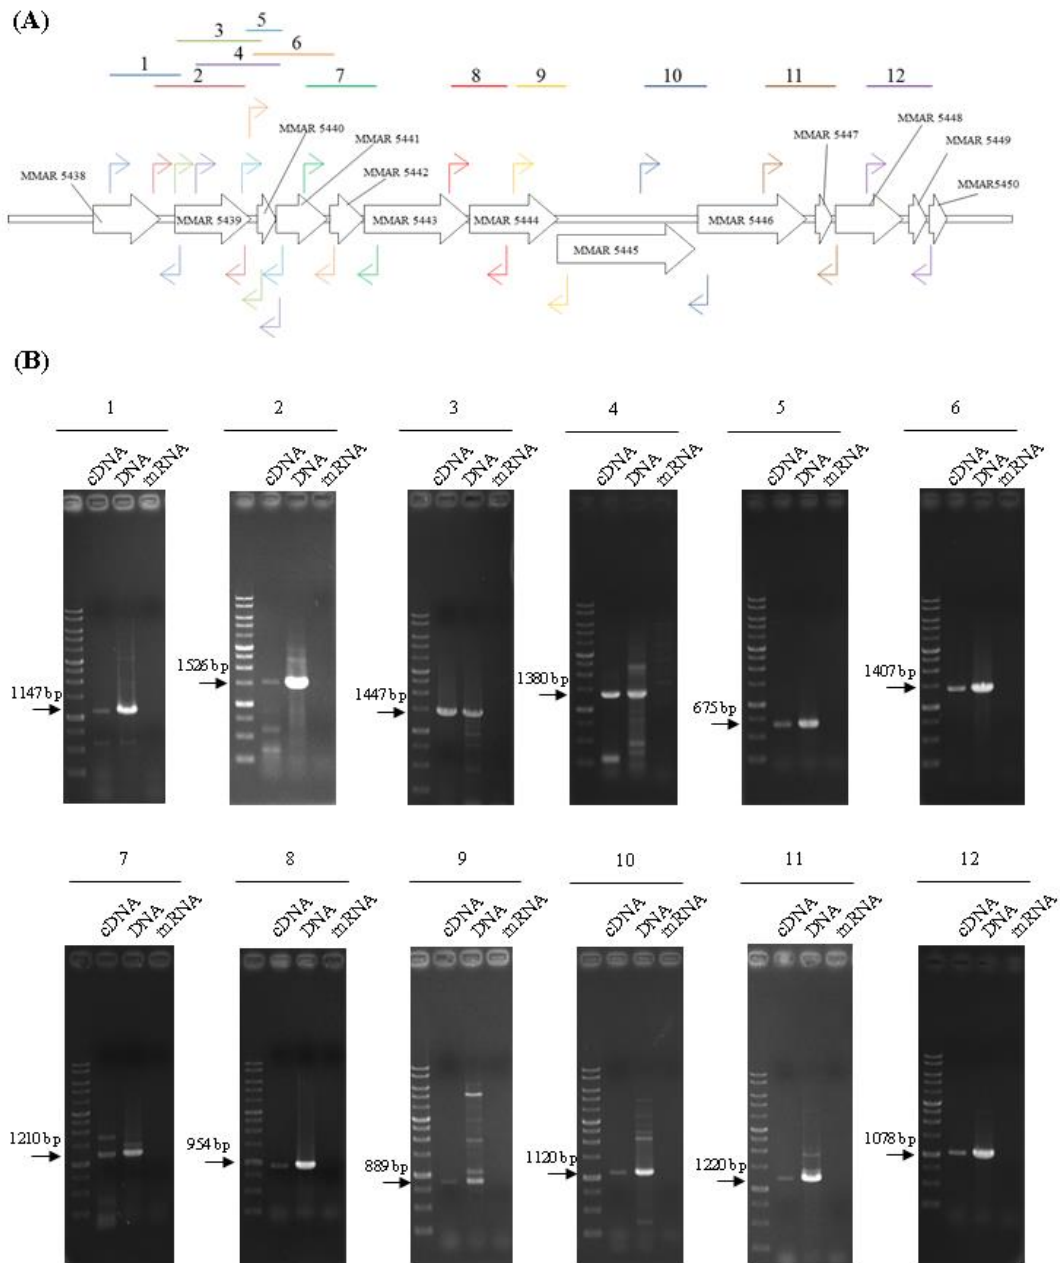

**Supplementary Figure 4. The sliding-related operon involves *mmar\_5438* to *mmar\_5450*.**

The primer pairs were: 1, *MMAR\_5438*-qF/ *5438-39* gap R; 2, *5438-39* gap F/  
*MMAR\_5439*-qR; 3, inverse 39 F/ *MMAR\_5440*-qR; 4, *MMAR5440*-Ff-F/ *5440-41*  
gap R; 5, *MMAR\_5439*-qF/ *MMAR\_5441*-qR; 6, *5439-40* gap F/ *5441-42* gap R; 7,

MMAR5443-Ff-F/ 5442-43 gap R; 8, MMAR\_5443-qF/ MMAR\_5444-qR; 9, 5444 F/ 5444-45 gap R; 10, 5445 F/ 5445-46 gap R; 11, 5446 F/ 5447-48 gap R; 12, 5448 F/ 5449-50 gap R. The primer list is in Supplementary Table 1. **(A)** Primer recognition sites. The bold horizontal lines indicate amplified gene fragments, and arrows indicate primers. **(B)** Data showing that the sliding-related operon involves *mmar\_5438* to *mmar\_5450*. Each gel is independent and not cropped from different parts of the same gel. cDNA: cDNA of *M. marinum* NTUH-M6885 (template); DNA: DNA of *M. marinum* NTUH-M6885 (positive control); mRNA: mRNA of *M. marinum* NTUH-M6885 (negative control, to exclude genomic DNA contamination).

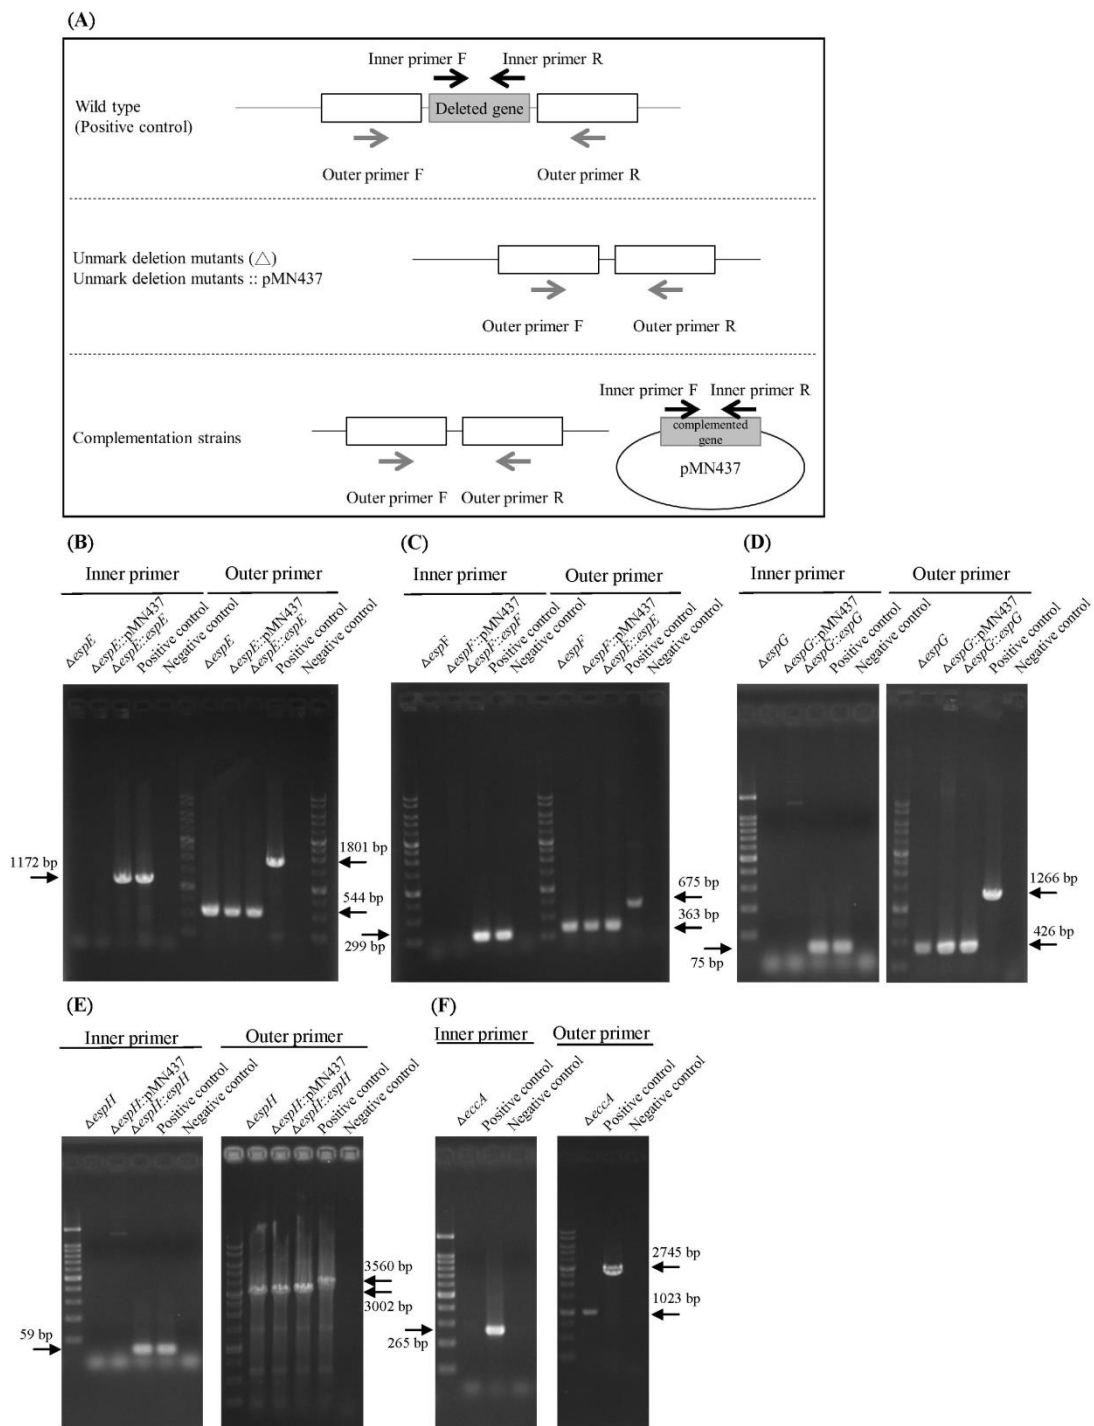

Supplementary Figure 5. PCR verification of the genotype of deletion mutants ( $\Delta espE$ ,  $\Delta espF$ ,  $\Delta espG$ ,  $\Delta espH$  and  $\Delta eccA1$ ), complementation strains, and the wild-type strain.

(A) Illustration of PCR reaction sites in different constructed strains. Black arrow: inner primer pairs targeted to the deleted genes. Gray arrow: outer primer pairs targeted to the flanking regions. (B) Inner primer pairs for *espE*: inverse 39-F and MMAR\_5439-qR; outer primer pairs for *espE*: 5438-39 gapF and MMAR\_5440-qR. (C) Inner primer pairs for *espF*: MMAR\_5440-qF and mmar\_5440 R (complementation); outer primer pairs for *espF*: MMAR\_5439-qF and MMAR\_5441-qR. (D) Inner primer pairs for *espG*: MMAR\_5441-qF and MMAR\_5441-qR; outer primer pairs for *espG*: MMAR\_5440-qF and 5441-42 gap R. (E) Inner primer pairs for *espH*: MMAR\_5442-qF and MMAR\_5442-qR; outer primer pairs for *espH*: 5440-41 gap F and 5443-44 gap R. (F) Inner primer pairs for *eccA1*: MMAR\_5443-qF and MMAR\_5443-qR2; outer primer pairs for *eccA1*: MMAR\_5442-qF and MMAR\_5444-qR. The positive control was wild-type DNA. The negative control was H<sub>2</sub>O. All primer sequences are shown in Supplementary Table 1.

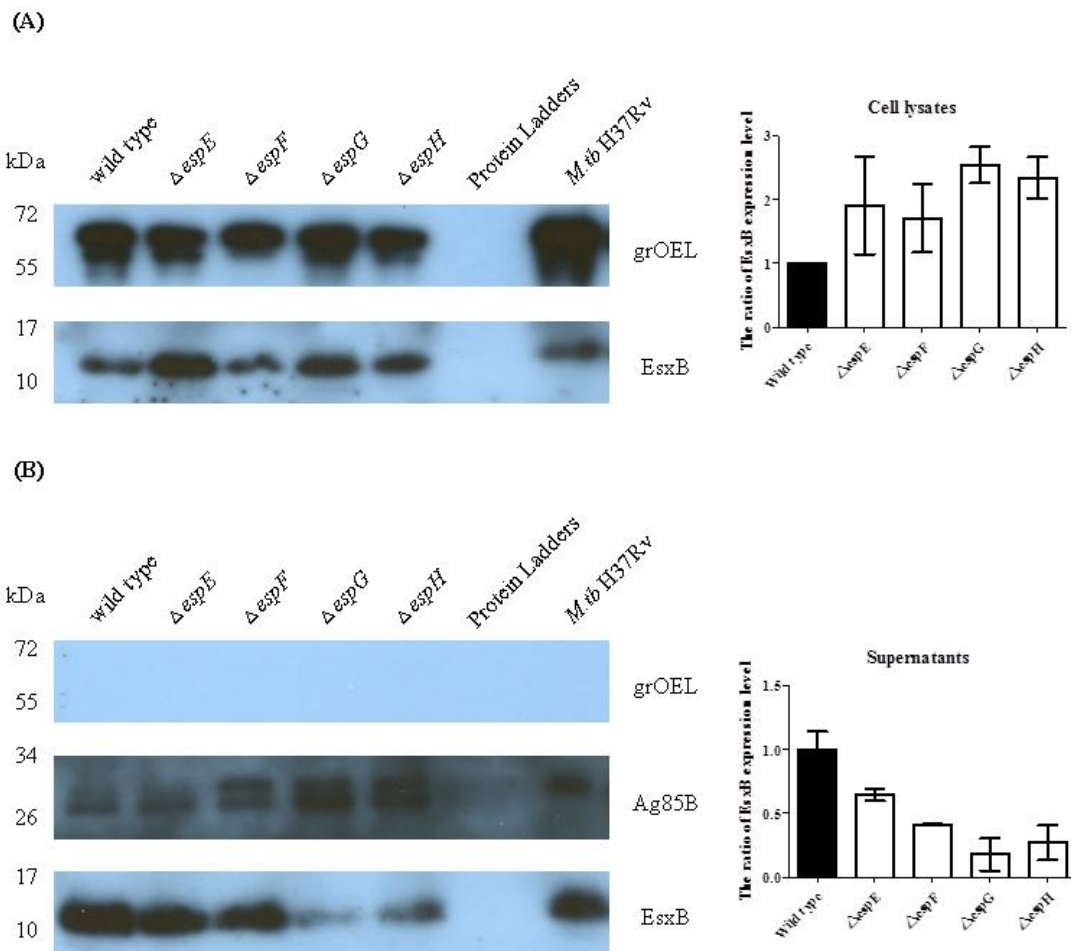

**Supplementary Figure 6. Western blot assay of the EsxB secretion in deletion mutants ( $\Delta espE$ ,  $\Delta espF$ ,  $\Delta espG$ , and  $\Delta espH$ ).**

(A) Cell lysates of the wild-type strain and deletion mutants were analyzed by western blot (left). Densitometry analysis of the western blots (right). The quantification of grOEL protein levels was used for normalization, with the wild-type diameter being assigned a value of 1. (B) Supernatants of the wild-type strain and deletion mutants were analyzed by western blot (left). Densitometry analysis of the western blots (right). The quantification of Ag85B protein levels was used for normalization, with the wild-type diameter being assigned a value of 1. All the strains had ESX-1 secretion ability. The  $\Delta espG$  and  $\Delta espH$  mutants had slightly reduced EsxB secretion. The cell fraction of *M. tuberculosis* H37Rv was used as a positive control. 20  $\mu$ g of cell lysates was separated by 15% SDS-PAGE. 10  $\mu$ g of cell filtrations was separated by 15% SDS-PAGE. Densitometry analysis was based on two independent experiments.

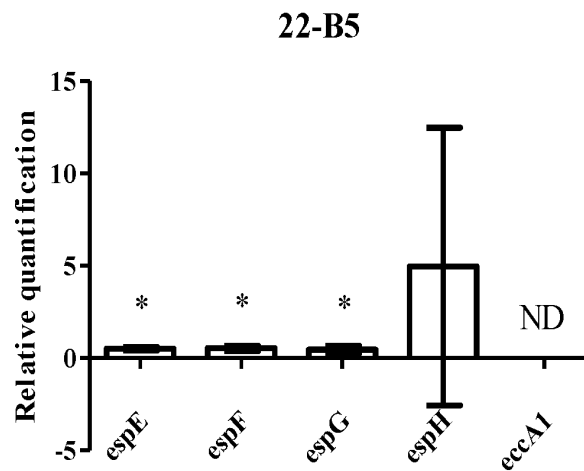

**Supplementary Figure 7. RT-PCR to detect the *espE*, *espF*, *espG*, and *espH* gene expression levels in 22-B5.**

The quantification of mRNA expression levels was normalized based on the wild-type strain. The results indicated that the gene expression levels of *espE*, *espF*, and *espG* decreased significantly in 22-B5. All data are from three independent experiments and they are presented as means  $\pm$  SDs with unpaired two-tailed Student's *t*-tests. ND: not determined. \*:  $P < 0.05$ .



WT

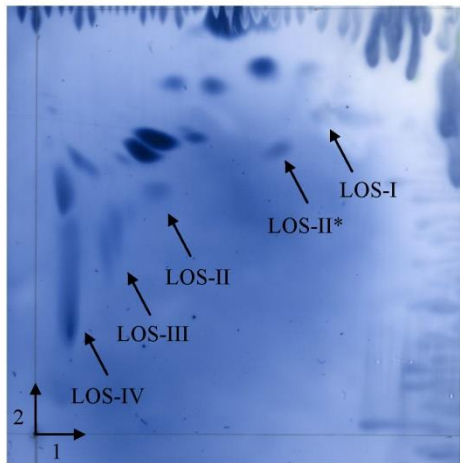
 $\Delta espE :: pMN437$ 
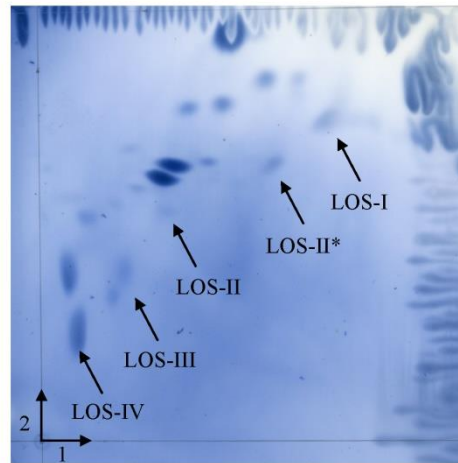

**Supplementary Figure 8. Detection of lipooligosaccharide (LOS) biosynthesis in the wild-type strain and  $\Delta espE$  mutant.**

Two-dimensional thin-layer chromatography (2D-TLC) was used to analyze the polar lipids in *M. marinum*. The polar lipids were separated by chloroform/methanol/water (20:10:2, v/v/v) in the first direction and by chloroform/acetic acid/methanol/water (20:12.5:1.5:2, v/v/v/v) in the second direction. The plates were sprayed with ceric ammonium molybdate (CAM) to visualize the LOS signals.
